## REPORTS OF SCIENTIFIC MEETINGS

*David E. Longnecker, M.D., Editor*

From time to time the editors review and evaluate the value of this portion of the Journal, and the editorial board has even considered discontinuing the Reports of Scientific Meetings. However, at present we are convinced that these reports should be continued. You, the readers, expressed your interest in the scientific meeting reports by your response to a recent survey in which 79% of respondents indicated that this section contained useful information. Further, we believe that a scientific meeting report can be a useful forum for conveying information that many readers might not obtain from other sources in a timely fashion. The latter may be especially useful when it involves matters of clinical practice, such as the report of an NIH-sponsored conference on the use of fresh frozen plasma as an adjunct to blood transfusion therapy (Miller RD: The National Institutes of Health consensus development conference on fresh frozen plasma: Indications and risks. *ANESTHESIOLOGY* 62:379-380,

1985), or directions in anesthesia research and development, such as the report of a symposium on anesthetic morbidity and mortality (Keats AS, Siker ES: International symposium on preventable anesthetic morbidity and mortality. *ANESTHESIOLOGY* 63:349-350, 1985).

Readers are encouraged to submit reports of meetings that are not attended by large groups of anesthesiologists but may be of interest to the anesthetic community. Examples include subspecialty meetings, basic or clinical research conferences, and symposia devoted to topics of interest to anesthesiologists. Such reports should be submitted promptly after the meeting, and they should interpret and summarize the highlights of the meeting, not simply outline the meeting program. Inquiries regarding the appropriateness of a specific conference as the subject of a scientific meeting report may be directed to the editor of this section of the Journal.
